# Supplementary material for: A pillar-layered binuclear 3D cobalt(ii) coordination polymer as an electrocatalyst for overall water splitting and as a chemosensor for Cr(vi) anion detection
Source: Royal Society of Chemistry journal article supplement (doi:10.1039/d1ce00685a), 2021-01-01
Supplement: d1ce00685a1.pdf [file d1ce00685a1.pdf]

Electronic Supplementary Information (ESI) for

## A Pillar-layered Binuclear 3D Cobalt(II) Coordination Polymer as Electrocatalyst for Overall Water Splitting and Chemosensor for Cr(VI) Anions Detection

Dongsheng Zhao<sup>a</sup>, Junqi Song<sup>a</sup>, Xiutang Zhang<sup>\*a</sup>, Feng Wang<sup>a</sup>, Bei Li<sup>a</sup>, Lulu Yang<sup>a</sup>, Yuxin Deng<sup>a</sup>, Qingbo Li<sup>\*b</sup>,  
Liming Fan<sup>\*a</sup>

<sup>a</sup>Department of Chemistry, College of Science, North University of China, Taiyuan, P. R. China.

<sup>b</sup>Center for Optics Research and Engineering, Shandong University, Qingdao, Shandong, P. R. China.

E-mail: limingfan@nuc.edu.cn; xiutangzhang@163.com; liqingbo2016@sdu.edu.cn.

### Table of Contents

|    |                                                                                                                                                                                    |   |
|----|------------------------------------------------------------------------------------------------------------------------------------------------------------------------------------|---|
| 10 | <b>Fig. S1</b> Selected H <sub>4</sub> TPTC and BIBP organic ligands in the assembly of <b>1</b> .....                                                                             | 2 |
|    | <b>Fig. S2</b> The asymmetry unit of <b>1</b> with 50% probability (Symmetry codes: i 1-x, 2-y, -z; ii 1-x, 1-y, 1-z; iii x, 1+y, -1+z; iv -x, 1-y, 1-z.).....                     | 2 |
|    | <b>Fig. S3</b> The coordination mode of TPTC <sup>4-</sup> ligand in <b>1</b> .....                                                                                                | 2 |
|    | <b>Fig. S4</b> The binuclear {Co <sub>2</sub> (COO) <sub>2</sub> } SBU in <b>1</b> .....                                                                                           | 2 |
| 15 | <b>Fig. S5</b> The BIBP as pillars to connect the binuclear {Co <sub>2</sub> (COO) <sub>2</sub> } SBUs in <b>1</b> .....                                                           | 3 |
|    | <b>Fig. S6</b> PXRD patterns of <b>1</b> under different conditions.....                                                                                                           | 3 |
|    | <b>Fig. S7</b> TGA curve for <b>1</b> .....                                                                                                                                        | 3 |
|    | <b>Fig. S8</b> The $\chi_m$ versus T of <b>1</b> .....                                                                                                                             | 3 |
|    | <b>Fig. S9</b> Relative cyclic voltammogram profile of NF.....                                                                                                                     | 4 |
| 20 | <b>Fig. S10</b> Lines fitting plots between $v^{1/2}$ and i of NF.....                                                                                                             | 4 |
|    | <b>Fig. S11</b> PXRD patterns of <b>1</b> after electrochemical testing.....                                                                                                       | 4 |
|    | <b>Fig. S12</b> The fluorescence spectra of free H <sub>4</sub> TPTC, BIBP and <b>1</b> in solid state at room temperature.....                                                    | 5 |
|    | <b>Fig. S13</b> The luminescence intensities of CP <b>1</b> which were dispersed in the aqueous solution of different anions.....                                                  | 5 |
|    | <b>Fig. S14</b> The changes of emission spectra of <b>1</b> in aqueous solutions with incremental addition of CrO <sub>4</sub> <sup>2-</sup> anion.....                            | 5 |
| 25 | <b>Fig. S15</b> The changes of emission spectra of <b>1</b> in aqueous solutions with incremental addition of Cr <sub>2</sub> O <sub>7</sub> <sup>2-</sup> anion.....              | 6 |
|    | <b>Fig. S16</b> The recycled tests for <b>1</b> to detect the (a) CrO <sub>4</sub> <sup>2-</sup> anion and (b) Cr <sub>2</sub> O <sub>7</sub> <sup>2-</sup> anion for 5 times..... | 6 |
|    | <b>Table S1</b> Crystal data for <b>1</b> .....                                                                                                                                    | 7 |
|    | <b>Table S2</b> Selected bond lengths (Å) and angles (°) for <b>1</b> .....                                                                                                        | 7 |
|    | <b>Table S3</b> Comparison of electrocatalytic performances of MOFs based materials for OER.....                                                                                   | 7 |
| 30 | <b>Table S4</b> Comparison of electrocatalytic performances of MOFs based materials for HER.....                                                                                   | 7 |
|    | <b>Table S5</b> Comparison of various MOFs based chemosensors for the detection of Cr(VI) anions.....                                                                              | 7 |

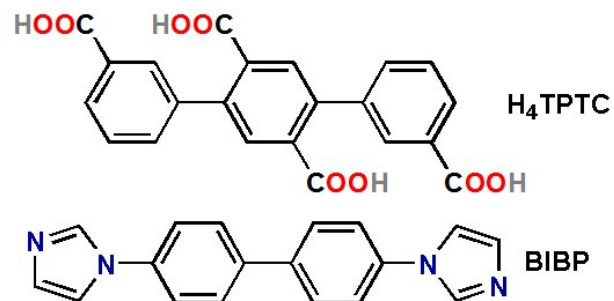

**Fig. S1** Selected  $\text{H}_4\text{TPTC}$  and  $\text{BIBP}$  organic ligands in the assembly of **1**.

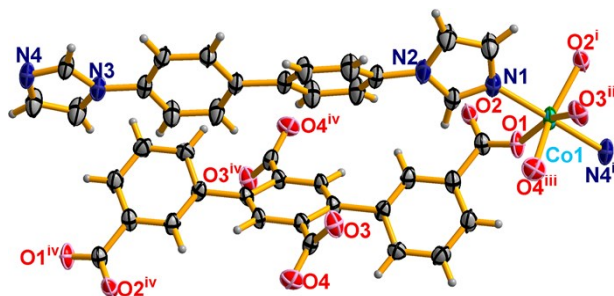

**Fig. S2** The asymmetry unit of **1** with 50% probability (Symmetry codes: i  $1-x, 2-y, -z$ ; ii  $1-x, 1-y, 1-z$ ; iii  $x, 1+y, -1+z$ ; iv  $-x, 1-y, 1-z$ ).

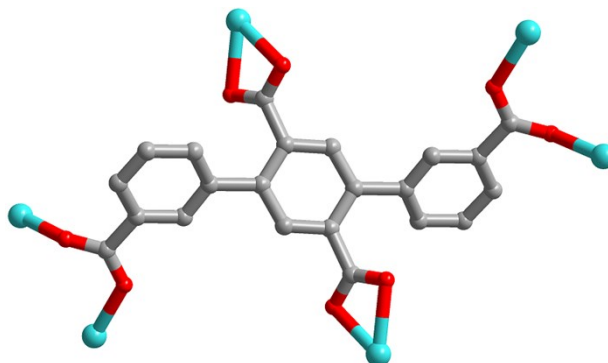

**Fig. S3** The coordination mode of  $\text{TPTC}^{4-}$  ligand in **1**.

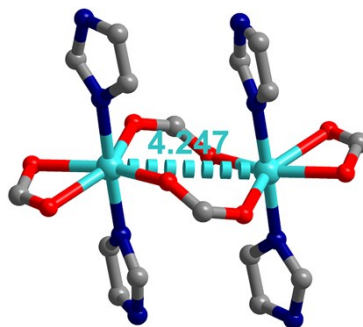

**Fig. S4** The binuclear  $\{\text{Co}_2(\text{COO})_2\}$  SBU in **1**.

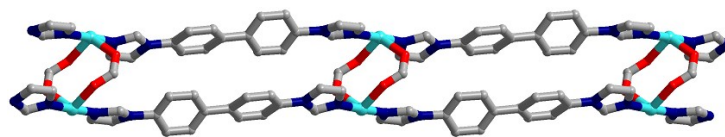

Fig. S5 The BIBP as pillars to connect the binuclear  $\{\text{Co}_2(\text{COO})_2\}$  SBUs in **1**.

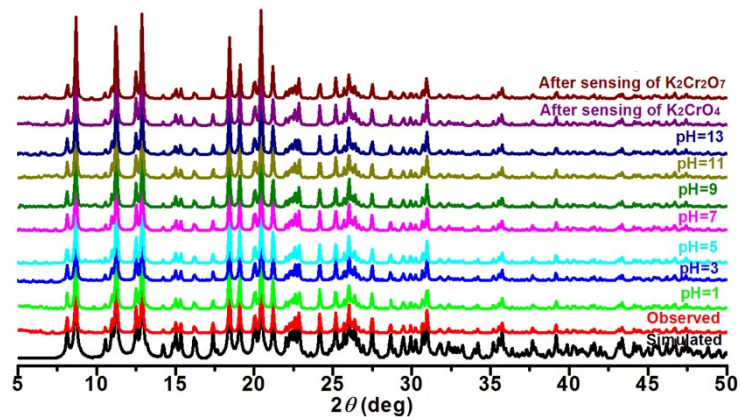

5

Fig. S6 PXRD patterns of **1** under different conditions.

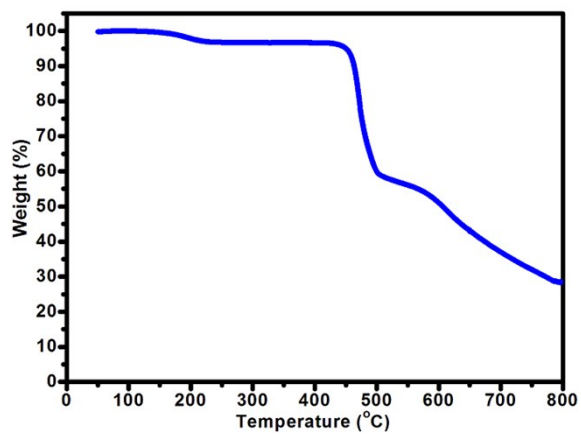

Fig. S7 TGA curve for **1**.

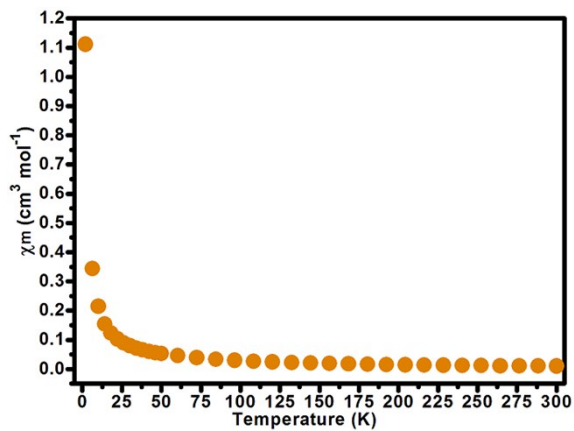

Fig. S8 The  $\chi_m$  versus T of **1**.

10

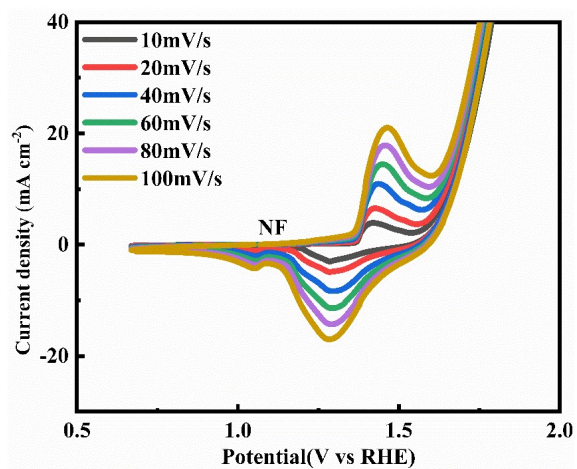

Fig. S9 Relative cyclic voltammogram profile of NF.

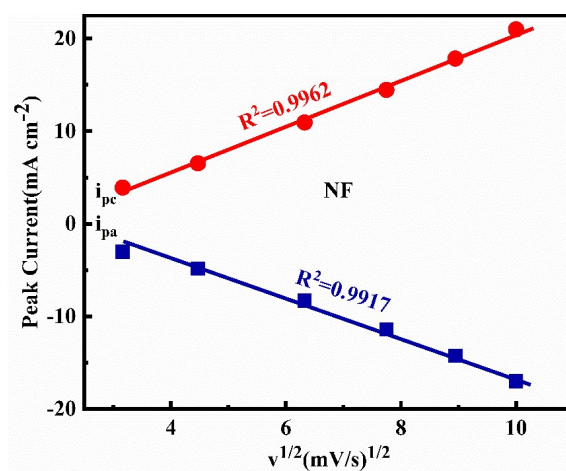

Fig. S10 Lines fitting plots between  $v^{1/2}$  and  $i$  of NF.

5

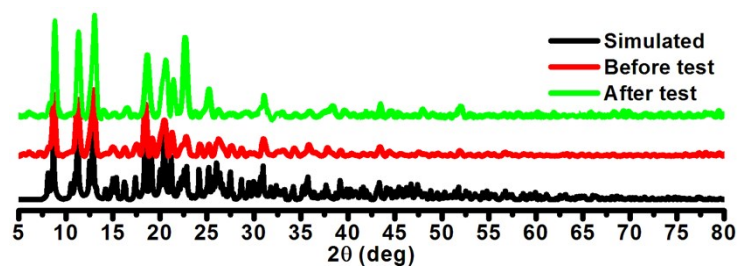

Fig. S11 PXRD patterns of 1 after electrochemical testing.

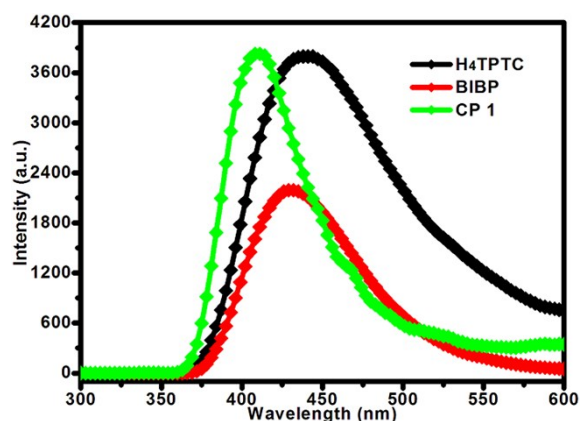

Fig. S12 The fluorescence spectra of free H<sub>4</sub>TPTC, BIBP and **1** in solid state at room temperature.

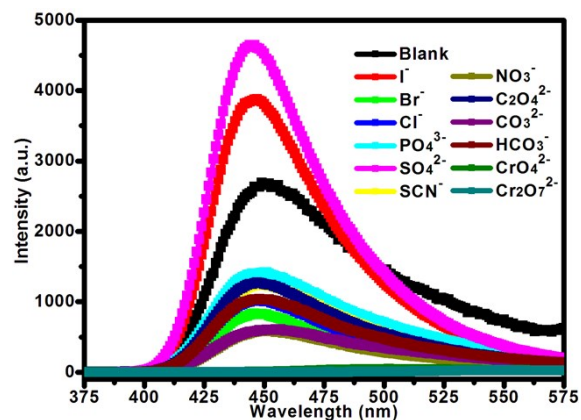

5 Fig. S13 The luminescence intensities of **1** which were dispersed in the aqueous solution of different anions.

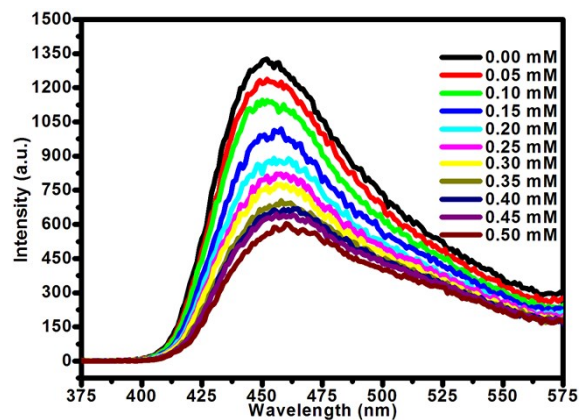

Fig. S14 The changes of emission spectra of **1** in aqueous solutions with incremental addition of CrO<sub>4</sub><sup>2-</sup> anion.

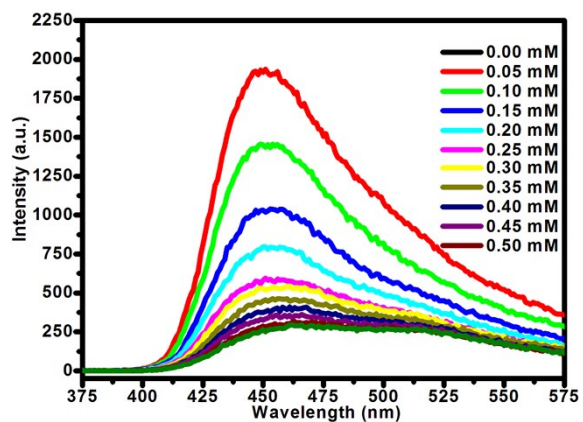

**Fig. S15** The changes of emission spectra of **1** in aqueous solutions with incremental addition of  $\text{Cr}_2\text{O}_7^{2-}$  anion.

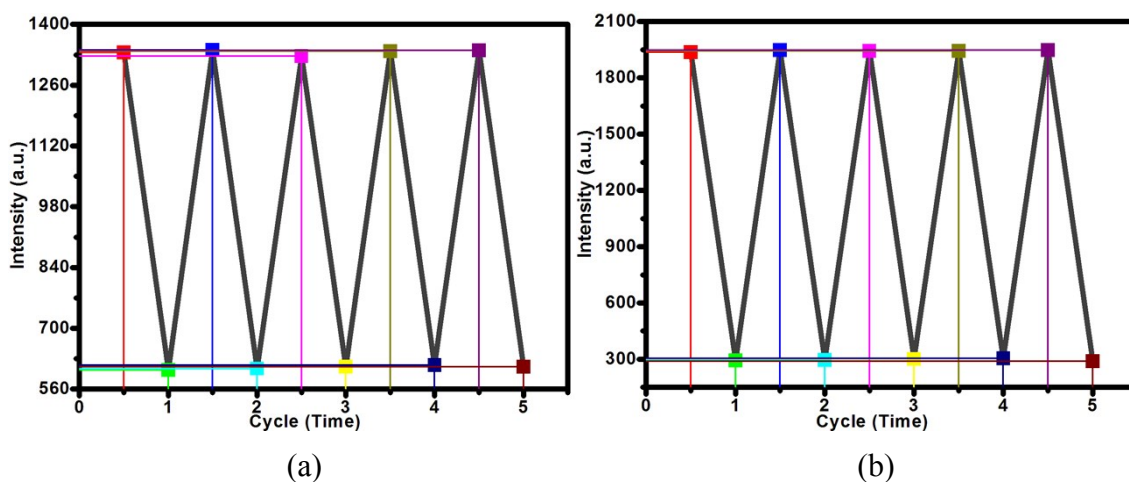

**Fig. S16** The recycled tests for **1** to detect the (a)  $\text{CrO}_4^{2-}$  anion and (b)  $\text{Cr}_2\text{O}_7^{2-}$  anion for 5 times.

5

**Table S1** Crystal data for **1**.

|                                                               |                                                                 |
|---------------------------------------------------------------|-----------------------------------------------------------------|
| Formula                                                       | C <sub>29</sub> H <sub>21</sub> CoN <sub>4</sub> O <sub>5</sub> |
| Formula weight                                                | 564.43                                                          |
| Crystal system                                                | Monoclinic                                                      |
| Space group                                                   | <i>P2<sub>1</sub>/c</i>                                         |
| <i>a</i> (Å)                                                  | 10.3161(3)                                                      |
| <i>b</i> (Å)                                                  | 14.7176(4)                                                      |
| <i>c</i> (Å)                                                  | 16.3208(4)                                                      |
| $\alpha$ (°)                                                  | 90                                                              |
| $\beta$ (°)                                                   | 98.968(3)                                                       |
| $\gamma$ (°)                                                  | 90                                                              |
| <i>V</i> (Å <sup>3</sup> )                                    | 2447.67(12)                                                     |
| <i>Z</i>                                                      | 4                                                               |
| <i>D</i> <sub>calcd</sub> (Mg/m <sup>3</sup> )                | 1.532                                                           |
| $\mu$ (mm <sup>-1</sup> )                                     | 0.751                                                           |
| Temperature (K)                                               | 295(2)                                                          |
| <i>F</i> (000)                                                | 1160                                                            |
| <i>R</i> <sub>int</sub>                                       | 0.0521                                                          |
| <i>R</i> <sub>1</sub> [ <i>I</i> > 2 $\sigma$ ( <i>I</i> )]   | 0.0465                                                          |
| w <i>R</i> <sub>2</sub> [ <i>I</i> > 2 $\sigma$ ( <i>I</i> )] | 0.1172                                                          |
| Gof                                                           | 1.044                                                           |

**Table S2** Selected bond lengths (Å) and angles (°) for **1**.

|                          |           |                                              |           |                                              |           |                               |           |
|--------------------------|-----------|----------------------------------------------|-----------|----------------------------------------------|-----------|-------------------------------|-----------|
| Co(1)-O(1)               | 2.036(2)  | O(2) <sup>#1</sup> -Co(1)-O(4) <sup>#3</sup> | 149.54(8) | N(1)-Co(1)-N(4) <sup>#2</sup>                | 178.24(9) | O(1)-Co(1)-O(4) <sup>#3</sup> | 99.40(8)  |
| Co(1)-O(2) <sup>#1</sup> | 2.0704(2) | N(4) <sup>#2</sup> -Co(1)-O(4) <sup>#3</sup> | 95.39(9)  | O(1)-Co(1)-O(3) <sup>#3</sup>                | 158.38(8) | O(1)-Co(1)-N(4) <sup>#2</sup> | 86.09(9)  |
| Co(1)-N(1)               | 2.118(2)  | O(2) <sup>#1</sup> -Co(1)-N(1)               | 93.31(9)  | O(2) <sup>#1</sup> -Co(1)-O(3) <sup>#3</sup> | 90.43(8)  | N(1)-Co(1)-O(4) <sup>#3</sup> | 85.32(9)  |
| Co(1)-N(4) <sup>#2</sup> | 2.132(2)  | O(3) <sup>#3</sup> -Co(1)-O(4) <sup>#3</sup> | 59.14(7)  | N(1)-Co(1)-O(3) <sup>#3</sup>                | 88.76(9)  | O(1)-Co(1)-O(2) <sup>#1</sup> | 111.06(9) |
| Co(1)-O(3) <sup>#3</sup> | 2.208(2)  | O(2) <sup>#1</sup> -Co(1)-N(4) <sup>#2</sup> | 86.90(9)  | N(4) <sup>#2</sup> -Co(1)-O(3) <sup>#3</sup> | 92.99(8)  | O(1)-Co(1)-N(1)               | 92.20(9)  |
| Co(1)-O(4) <sup>#3</sup> | 2.224(2)  |                                              |           |                                              |           |                               |           |

Symmetry codes: #1 -x+1, -y+1, -z+2; #2 x+1, y, z+1; #3 x, -y+1/2, z+1/2.

**Table S3** Comparison of electrocatalytic performances of MOFs based materials for OER.

| Catalyst                    | Substrate | Electrolyte | $\eta_{10}$ | Reference        |
|-----------------------------|-----------|-------------|-------------|------------------|
| Co-BPDC/Co-BDC <sub>3</sub> | GCE       | 1 M KOH     | 335 mV      | 47               |
| UTSA-16                     | GCE       | 1 M KOH     | 408 mV      | 48               |
| Co-ZIF-9(III)               | GCE       | 1 M KOH     | 380 mV      | 49               |
| Unsaturated ZIF-67          | GCE       | 1 M KOH     | 410 mV      | 50               |
| CTGU-14                     | GCE       | 1 M KOH     | 454 mV      | 51               |
| <b>1</b> @NF                | NF        | 1 M KOH     | 377 mV      | <b>this work</b> |

**Table S4** Comparison of electrocatalytic performances of MOFs based materials for HER.

| Catalyst               | Substrate | Electrolyte | $\eta_{10}$ | Reference        |
|------------------------|-----------|-------------|-------------|------------------|
| Ni-ZIF                 | GCE       | 1 M KOH     | 218 mV      | 52               |
| Fe <sub>2</sub> Co-MOF | GCE       | 1 M KOH     | 221 mV      | 53               |
| NiFe-MOF               | NF        | 1 M KOH     | 255 mV      | 54               |
| Co/Cu-MOF              | GCE       | 1 M KOH     | 391 mV      | 55               |
| Ni-CP                  | GCE       | 1 M KOH     | 422 mV      | 56               |
| <b>1</b> @NF           | NF        | 1 M KOH     | 242 mV      | <b>this work</b> |

**Table S5** Comparison of various MOFs based chemosensors for the detection of Cr(VI) anions.

| Analyte                                      | MOFs based Fluorescent Materials                                                            | Quenching constant (K <sub>SV</sub> , M <sup>-1</sup> ) | Detection Limits          | Media            | Ref              |
|----------------------------------------------|---------------------------------------------------------------------------------------------|---------------------------------------------------------|---------------------------|------------------|------------------|
| CrO <sub>4</sub> <sup>2-</sup>               | [Cd <sub>2</sub> (HDDDB)(bib) <sub>1.5</sub> (H <sub>2</sub> O)]                            | 4.7 × 10 <sup>3</sup>                                   | N/A                       | H <sub>2</sub> O | 61               |
|                                              | [Cd <sub>2</sub> (HDDDB)( <i>m</i> -bimb)]                                                  | 2.5 × 10 <sup>3</sup>                                   | N/A                       | H <sub>2</sub> O |                  |
|                                              | [Cd <sub>2</sub> (DDB)( <i>p</i> -bimb)]                                                    | 6.0 × 10 <sup>3</sup>                                   | N/A                       | H <sub>2</sub> O |                  |
|                                              | [Tb(Hbptc)(H <sub>2</sub> O) <sub>4</sub> ]                                                 | 1.27 × 10 <sup>4</sup>                                  | 2.36 × 10 <sup>-6</sup> M | H <sub>2</sub> O | 62               |
|                                              | [Ni <sub>1.5</sub> (H <sub>2</sub> L)(bib) <sub>1.5</sub> (H <sub>2</sub> O) <sub>2</sub> ] | 3.0 × 10 <sup>3</sup>                                   | N/A                       | H <sub>2</sub> O | 63               |
|                                              | [Pb <sub>2</sub> (HL)(bib) <sub>1.5</sub> (H <sub>2</sub> O)]                               | 7.4 × 10 <sup>3</sup>                                   | N/A                       | H <sub>2</sub> O |                  |
|                                              | {[Co(TPTC) <sub>0.5</sub> (BIBP)]·H <sub>2</sub> O} <sub>n</sub>                            | 2.5 × 10 <sup>3</sup>                                   | 3.42 × 10 <sup>-6</sup> M | H <sub>2</sub> O | <b>this work</b> |
| Cr <sub>2</sub> O <sub>7</sub> <sup>2-</sup> | [Cd <sub>2</sub> (HDDDB)(bib) <sub>1.5</sub> (H <sub>2</sub> O)]                            | 2.7 × 10 <sup>4</sup>                                   | N/A                       | H <sub>2</sub> O | 61               |
|                                              | [Cd <sub>2</sub> (HDDDB)( <i>m</i> -bimb)]                                                  | 1.8 × 10 <sup>4</sup>                                   | N/A                       | H <sub>2</sub> O |                  |
|                                              | [Cd <sub>2</sub> (DDB)( <i>p</i> -bimb)]                                                    | 2.8 × 10 <sup>4</sup>                                   | N/A                       | H <sub>2</sub> O |                  |
|                                              | [Cd(TIPA) <sub>2</sub> (ClO <sub>4</sub> ) <sub>2</sub> ]                                   | 7.15 × 10 <sup>4</sup>                                  | 8 ppb                     | H <sub>2</sub> O | 62               |
|                                              | [Tb(Hbptc)(H <sub>2</sub> O) <sub>4</sub> ]                                                 | 1.04 × 10 <sup>5</sup>                                  | 2.88 × 10 <sup>-7</sup> M | H <sub>2</sub> O | 63               |
|                                              | [Cd <sub>3</sub> {Ir(ppy-COO) <sub>3</sub> } <sub>2</sub> ]                                 | 3.475 × 10 <sup>4</sup>                                 | 145.1 ppb                 | H <sub>2</sub> O | 64               |
|                                              | [Ni <sub>1.5</sub> (H <sub>2</sub> L)(bib) <sub>1.5</sub> (H <sub>2</sub> O) <sub>2</sub> ] | 2.9 × 10 <sup>4</sup>                                   | N/A                       | H <sub>2</sub> O | 65               |
|                                              | [Pb <sub>2</sub> (HL)(bib) <sub>1.5</sub> (H <sub>2</sub> O)]                               | 2.8 × 10 <sup>4</sup>                                   | N/A                       | H <sub>2</sub> O |                  |
|                                              | {[Co(TPTC) <sub>0.5</sub> (BIBP)]·H <sub>2</sub> O} <sub>n</sub>                            | 1.15 × 10 <sup>4</sup>                                  | 2.96 × 10 <sup>-7</sup> M | H <sub>2</sub> O | <b>this work</b> |
